# Supplementary material
Source: HighWire-hosted journal article supplement (https://gut.bmj.com/content/gutjnl-2021-325021)
Supplement: inline-supplementary-material-2 [file inline-supplementary-material-2.pdf]

## Supplementary Figure 1

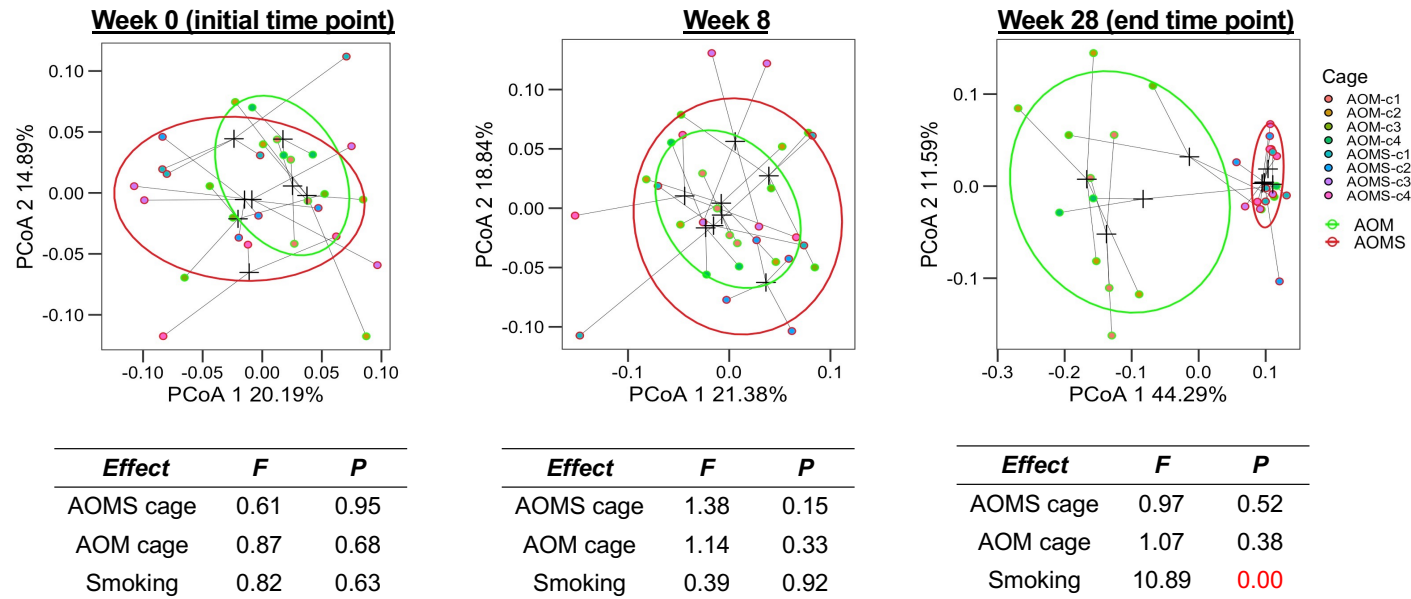

**Supplementary Figure 1.** To test the impact of the cage parameter on the gut microbiome, we collected stool samples at three time points and performed analysis for each group (AOM and AOM+Smoking (AOMS)). Both AOM and AOMS groups were housed in four cages with 3-4 mice per cage ( $n = 15$  mice). We found that the cage parameter has no significant impact on the microbiome at all time points in the AOM or AOMS group. The impact of different parameters on microbial communities was measured by PERMANOVA with 1,000 iterations using the Arrhenius  $z$  distance.
