# Supplementary material
Source: HighWire-hosted journal article supplement (https://gut.bmj.com/content/gutjnl-2021-325021)
Supplement: inline-supplementary-material-4 [file inline-supplementary-material-4.pdf]

## Supplementary Figure 3

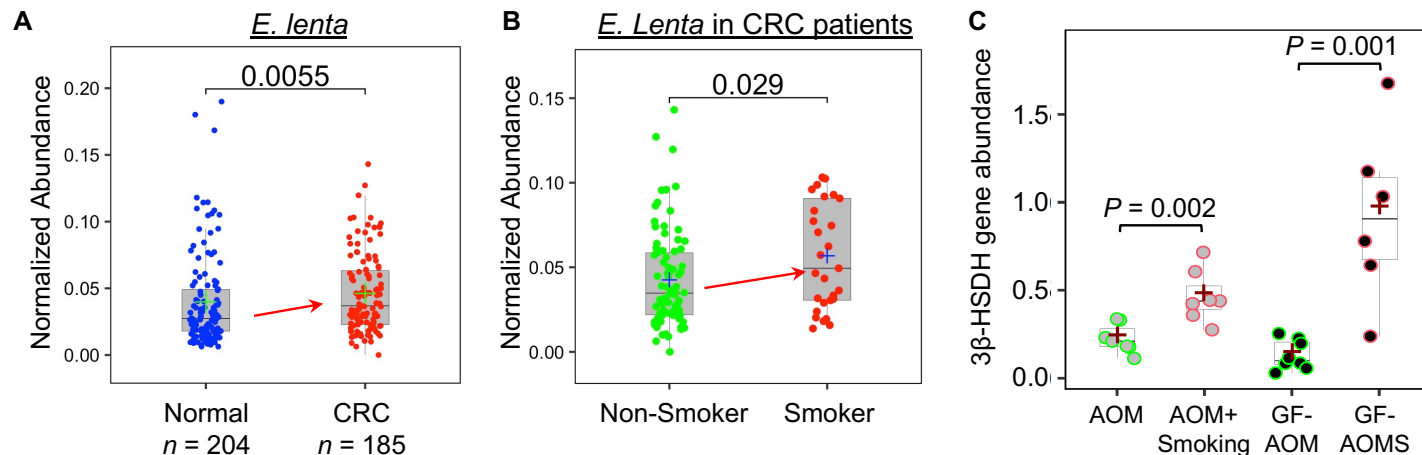

**Supplementary Figure 3.** (A) Our in-house cohort confirmed that *Eggerthella. lenta* is significantly abundant in CRC patients ( $n = 185$ ) compared to normal subjects ( $n = 204$ ). (B) The smokers had higher abundance of *E. lenta* compared to non-smokers in CRC patients ( $P < 0.05$ ). The abundance of *E. lenta* was normalized by arcsine square root. (C) The abundance of genes encoding 3β-HSDH enzymes was measured in each group (**Supplementary Methods**), and we observed significantly higher abundance in smoking group compared to non-smoking group. The symbol “+” represent the mean abundance.
