# Supplementary material
Source: HighWire-hosted journal article supplement (https://gut.bmj.com/content/gutjnl-2021-325021)
Supplement: inline-supplementary-material-5 [file inline-supplementary-material-5.pdf]

**Supplementary Table 1. Primer sequences used in this study**

| <b>Gene</b>                  | <b>Forward 5'-3'</b>    | <b>Reverse 5'-3'</b>     |
|------------------------------|-------------------------|--------------------------|
| IL17a                        | CAGACTACCTCAACCGTTCCAC  | TCCAGCTTTCCTCCGCATTGA    |
| Cxcl2                        | CATCCAGAGCTTGAGTGTGACG  | GGCTTCAGGGTCAAGGCAAAC    |
| Cxcr2                        | CTCTATTCTGCCAGATGCTGTCC | ACAAGGCTCAGCAGAGTCACCA   |
| IL10                         | CGGGAAGACAATAACTGCACCC  | CGGTTAGCAGTATGTTGTCCAGC  |
| $\beta$ -actin               | CATTGCTGACAGGATGCAGAAGG | TGCTGGAAGGTGGACAGTGAGG   |
| <i>E. lenta</i> <sup>1</sup> | CTTGCTCCGGACAACCTTGGA   | CTTCTTCTGCAGGTACCGTCAATT |
| 16S                          | ACTCCTACGGGAGGCAGCAGT   | ATTACCGCGGCTGCTGGC       |

**Supplementary Table 2. Detail information of the dysregulated genes of Cancer Pathway in AOM model (AOM+Smoking vs AOM)**

| Gene    | Full name                                                      | P value | FDR  | Fold Change |
|---------|----------------------------------------------------------------|---------|------|-------------|
| Tbx2    | T-box transcription factor 2                                   | 0.02    | 0.14 | 3.58        |
| Pgf     | Placental growth factor                                        | 0.11    | 0.19 | 3.50        |
| Flt1    | FMS-like tyrosine kinase 1                                     | 0.13    | 0.20 | 3.12        |
| Mki67   | Marker of proliferation Ki-67                                  | 0.07    | 0.18 | 2.90        |
| Stmn1   | Stathmin 1                                                     | 0.05    | 0.18 | 2.88        |
| Cdc20   | Cell division cycle 20                                         | 0.09    | 0.18 | 2.84        |
| Skp2    | S-phase kinase-associated protein 2                            | 0.08    | 0.18 | 2.77        |
| Angpt2  | Angiopoietin 2                                                 | 0.08    | 0.18 | 2.63        |
| Aurka   | Aurora kinase A                                                | 0.07    | 0.18 | 2.61        |
| Acly    | ATP citrate lyase                                              | 0.06    | 0.18 | 2.57        |
| Igfbp3  | Insulin-like growth factor binding protein 3                   | 0.08    | 0.18 | 2.53        |
| Tnks    | Tankyrase                                                      | 0.01    | 0.09 | 2.49        |
| Ccl2    | Chemokine (C-C motif) ligand 2                                 | 0.29    | 0.35 | 2.34        |
| Cdh2    | Cadherin 2                                                     | 0.48    | 0.55 | 2.22        |
| Ercc5   | Excision repair cross-complementation group 5                  | 0.08    | 0.18 | 2.17        |
| Xrcc4   | X-ray repair cross-complementing 4                             | 0.02    | 0.14 | 2.15        |
| Dkc1    | Dyskeratosis congenita 1                                       | 0.12    | 0.20 | 2.09        |
| Mcm2    | Minichromosome maintenance deficient 2                         | 0.12    | 0.20 | 2.09        |
| Snai1   | Snail family zinc finger 1                                     | 0.47    | 0.54 | 2.01        |
| Atrx    | Alpha thalassemia/mental retardation syndrome X-linked homolog | 0.09    | 0.18 | 0.47        |
| Snai3   | Snail family zinc finger 3                                     | 0.30    | 0.36 | 0.44        |
| Tek     | Tyrosine kinase                                                | 0.15    | 0.23 | 0.41        |
| Apaf1   | Apoptotic peptidase activating factor 1                        | 0.17    | 0.24 | 0.41        |
| Tinf2   | Terf1 (TRF1)-interacting nuclear factor 2                      | 0.07    | 0.18 | 0.41        |
| Terf2ip | Telomeric repeat binding factor 2                              | 0.13    | 0.20 | 0.40        |
| Gadd45g | Growth arrest and DNA-damage-inducible 45γ                     | 0.07    | 0.18 | 0.28        |

**Supplementary Table 3. Detail information of the dysregulated genes of Inflammatory Response and Autoimmunity in AOM model (AOM+Smoking vs AOM)**

| Gene    | Full name                                             | P value | FDR  | Fold Change |
|---------|-------------------------------------------------------|---------|------|-------------|
| Cxcl5   | Chemokine (C-X-C motif) ligand 5                      | 0.03    | 0.26 | 14.61       |
| Ifng    | Interferon gamma                                      | 0.01    | 0.24 | 5.40        |
| Cxcl1   | Chemokine (C-X-C motif) ligand 1                      | 0.21    | 0.45 | 4.09        |
| Ccl19   | Chemokine (C-C motif) ligand 19                       | 0.28    | 0.51 | 3.81        |
| Tnfsf14 | Tumor necrosis factor (ligand) superfamily, member 14 | 0.11    | 0.34 | 3.79        |
| Cxcr1   | Chemokine (C-X-C motif) receptor 1                    | 0.05    | 0.27 | 3.69        |
| Sele    | Selectin, endothelial cell                            | 0.07    | 0.27 | 3.65        |
| Il6ra   | Interleukin 6 receptor, alpha                         | 0.07    | 0.27 | 3.62        |
| Il17a   | Interleukin 17A                                       | 0.07    | 0.27 | 3.58        |
| Il6     | Interleukin 6                                         | 0.12    | 0.34 | 3.45        |
| Cxcr4   | Chemokine (C-X-C motif) receptor 4                    | 0.92    | 0.96 | 3.21        |
| Ccl3    | Chemokine (C-C motif) ligand 3                        | 0.08    | 0.27 | 3.19        |
| Cxcl2   | Chemokine (C-X-C motif) ligand 2                      | 0.09    | 0.29 | 2.98        |
| Cd40lg  | CD40 ligand                                           | 0.21    | 0.45 | 2.80        |
| Tlr9    | Toll-like receptor 9                                  | 0.88    | 0.96 | 2.70        |
| Ccl7    | Chemokine (C-C motif) ligand 7                        | 0.04    | 0.27 | 2.67        |
| Ltb     | Lymphotoxin B                                         | 0.96    | 0.98 | 2.66        |
| Il1b    | Interleukin 1 beta                                    | 0.03    | 0.26 | 2.63        |
| Il22    | Interleukin 22                                        | 0.27    | 0.51 | 2.62        |
| Il23a   | Interleukin-23 subunit alpha                          | 0.08    | 0.27 | 2.62        |
| Cxcl9   | Chemokine (C-X-C motif) ligand 9                      | 0.30    | 0.51 | 2.39        |
| Ccr3    | Chemokine (C-C motif) receptor 3                      | 0.05    | 0.27 | 2.38        |
| Ccr4    | Chemokine (C-C motif) receptor 4                      | 0.20    | 0.45 | 2.33        |
| Lta     | Lymphotoxin A                                         | 0.89    | 0.96 | 2.32        |
| Ccl2    | Chemokine (C-C motif) ligand 2                        | 0.03    | 0.26 | 2.09        |
| Itgb2   | Integrin beta 2                                       | 0.30    | 0.51 | 2.06        |
| Il5     | Interleukin 5                                         | 0.28    | 0.51 | 2.00        |
| Ccr2    | Chemokine (C-C motif) receptor 2                      | 0.24    | 0.49 | 0.40        |
| Ccr7    | Chemokine (C-C motif) receptor 7                      | 0.39    | 0.57 | 0.36        |
| Il10    | Interleukin 10                                        | 0.12    | 0.34 | 0.29        |
| Ccl22   | Chemokine (C-C motif) ligand 22                       | 0.12    | 0.34 | 0.26        |
| Ccl24   | Chemokine (C-C motif) ligand 24                       | 0.00    | 0.24 | 0.20        |

**Supplementary Table 4. Detail information of the dysregulated genes of Cancer Pathway in germ-free model (GF-AOMS vs GF-AOM)**

| Gene    | Full name                                    | <i>P</i> value | <i>FDR</i> | Fold Change |
|---------|----------------------------------------------|----------------|------------|-------------|
| Map2k1  | Mitogen-activated protein kinase kinase 1    | 0.40           | 0.90       | 2.10        |
| Casp2   | Caspase 2                                    | 0.57           | 0.90       | 1.90        |
| Mki67   | Marker of proliferation Ki-67                | 0.66           | 0.90       | 1.89        |
| Pgf     | Placental growth factor                      | 0.96           | 0.98       | 1.70        |
| Gsc     | Goosecoid                                    | 0.52           | 0.90       | 1.69        |
| Igfbp5  | Insulin-like growth factor binding protein 5 | 0.12           | 0.90       | 1.68        |
| Fasl    | Fas ligand (TNF superfamily, member 6)       | 0.47           | 0.90       | 1.57        |
| Car9    | Carbonic anhydrase 9                         | 0.64           | 0.90       | 1.56        |
| Angpt2  | Angiopoietin 2                               | 0.72           | 0.90       | 1.53        |
| Cpt2    | Carnitine palmitoyltransferase 2             | 0.10           | 0.90       | 0.53        |
| Apaf1   | Apoptotic peptidase activating factor 1      | 0.39           | 0.90       | 0.48        |
| Gadd45g | Growth arrest and DNA-damage-inducible 45γ   | 0.49           | 0.90       | 0.37        |

**Supplementary Table 5. Detail information of the dysregulated genes of Inflammatory Response and Autoimmunity in germ-free model (GF-AOMS vs GF-AOM)**

| Gene   | Full name                          | <i>P</i> value | <i>FDR</i> | Fold Change |
|--------|------------------------------------|----------------|------------|-------------|
| Cxcl2  | Chemokine (C-X-C motif) ligand 2   | 0.01           | 0.43       | 6.20        |
| Nos2   | Nitric oxide synthase 2            | 0.22           | 0.81       | 4.92        |
| Cxcl3  | Chemokine (C-X-C motif) ligand 3   | 0.10           | 0.81       | 4.66        |
| Cxcr2  | Chemokine (C-X-C motif) receptor 2 | 0.29           | 0.81       | 4.05        |
| Cd40lg | CD40 ligand                        | 0.13           | 0.81       | 3.71        |
| Il17a  | Interleukin 17A                    | 0.20           | 0.81       | 3.57        |
| Sele   | Selectin, endothelial cell         | 0.33           | 0.81       | 3.46        |
| Ccl5   | Chemokine (C-C motif) ligand 5     | 0.16           | 0.81       | 3.24        |
| Ifng   | Interferon gamma                   | 0.38           | 0.81       | 2.80        |
| Ccr4   | Chemokine (C-C motif) receptor 4   | 0.22           | 0.81       | 2.74        |
| Cxcl11 | Chemokine (C-X-C motif) ligand 11  | 0.43           | 0.81       | 2.63        |
| Crp    | C-reactive protein                 | 0.23           | 0.81       | 2.59        |
| Cd14   | CD14 molecule                      | 0.01           | 0.43       | 2.38        |
| C3     | Complement component 3             | 0.32           | 0.81       | 2.31        |
| Ccl19  | Chemokine (C-C motif) ligand 19    | 0.03           | 0.74       | 2.26        |
| C4b    | Complement component 4B            | 0.25           | 0.81       | 2.00        |

**Reference**

1. Kageyama A, Benno Y, Nakase T. Phylogenetic evidence for the transfer of *Eubacterium lentum* to the genus *Eggerthella* as *Eggerthella lenta* gen. nov., comb. nov. *Int J Syst Bacteriol* 1999;49 Pt 4:1725-32. doi: 10.1099/00207713-49-4-1725 [published Online First: 1999/11/11]
