# Supplementary material
Source: HighWire-hosted journal article supplement (https://gut.bmj.com/content/gutjnl-2021-325021)
Supplement: inline-supplementary-material-8 [file inline-supplementary-material-8.pdf]

Supplementary Figure 6

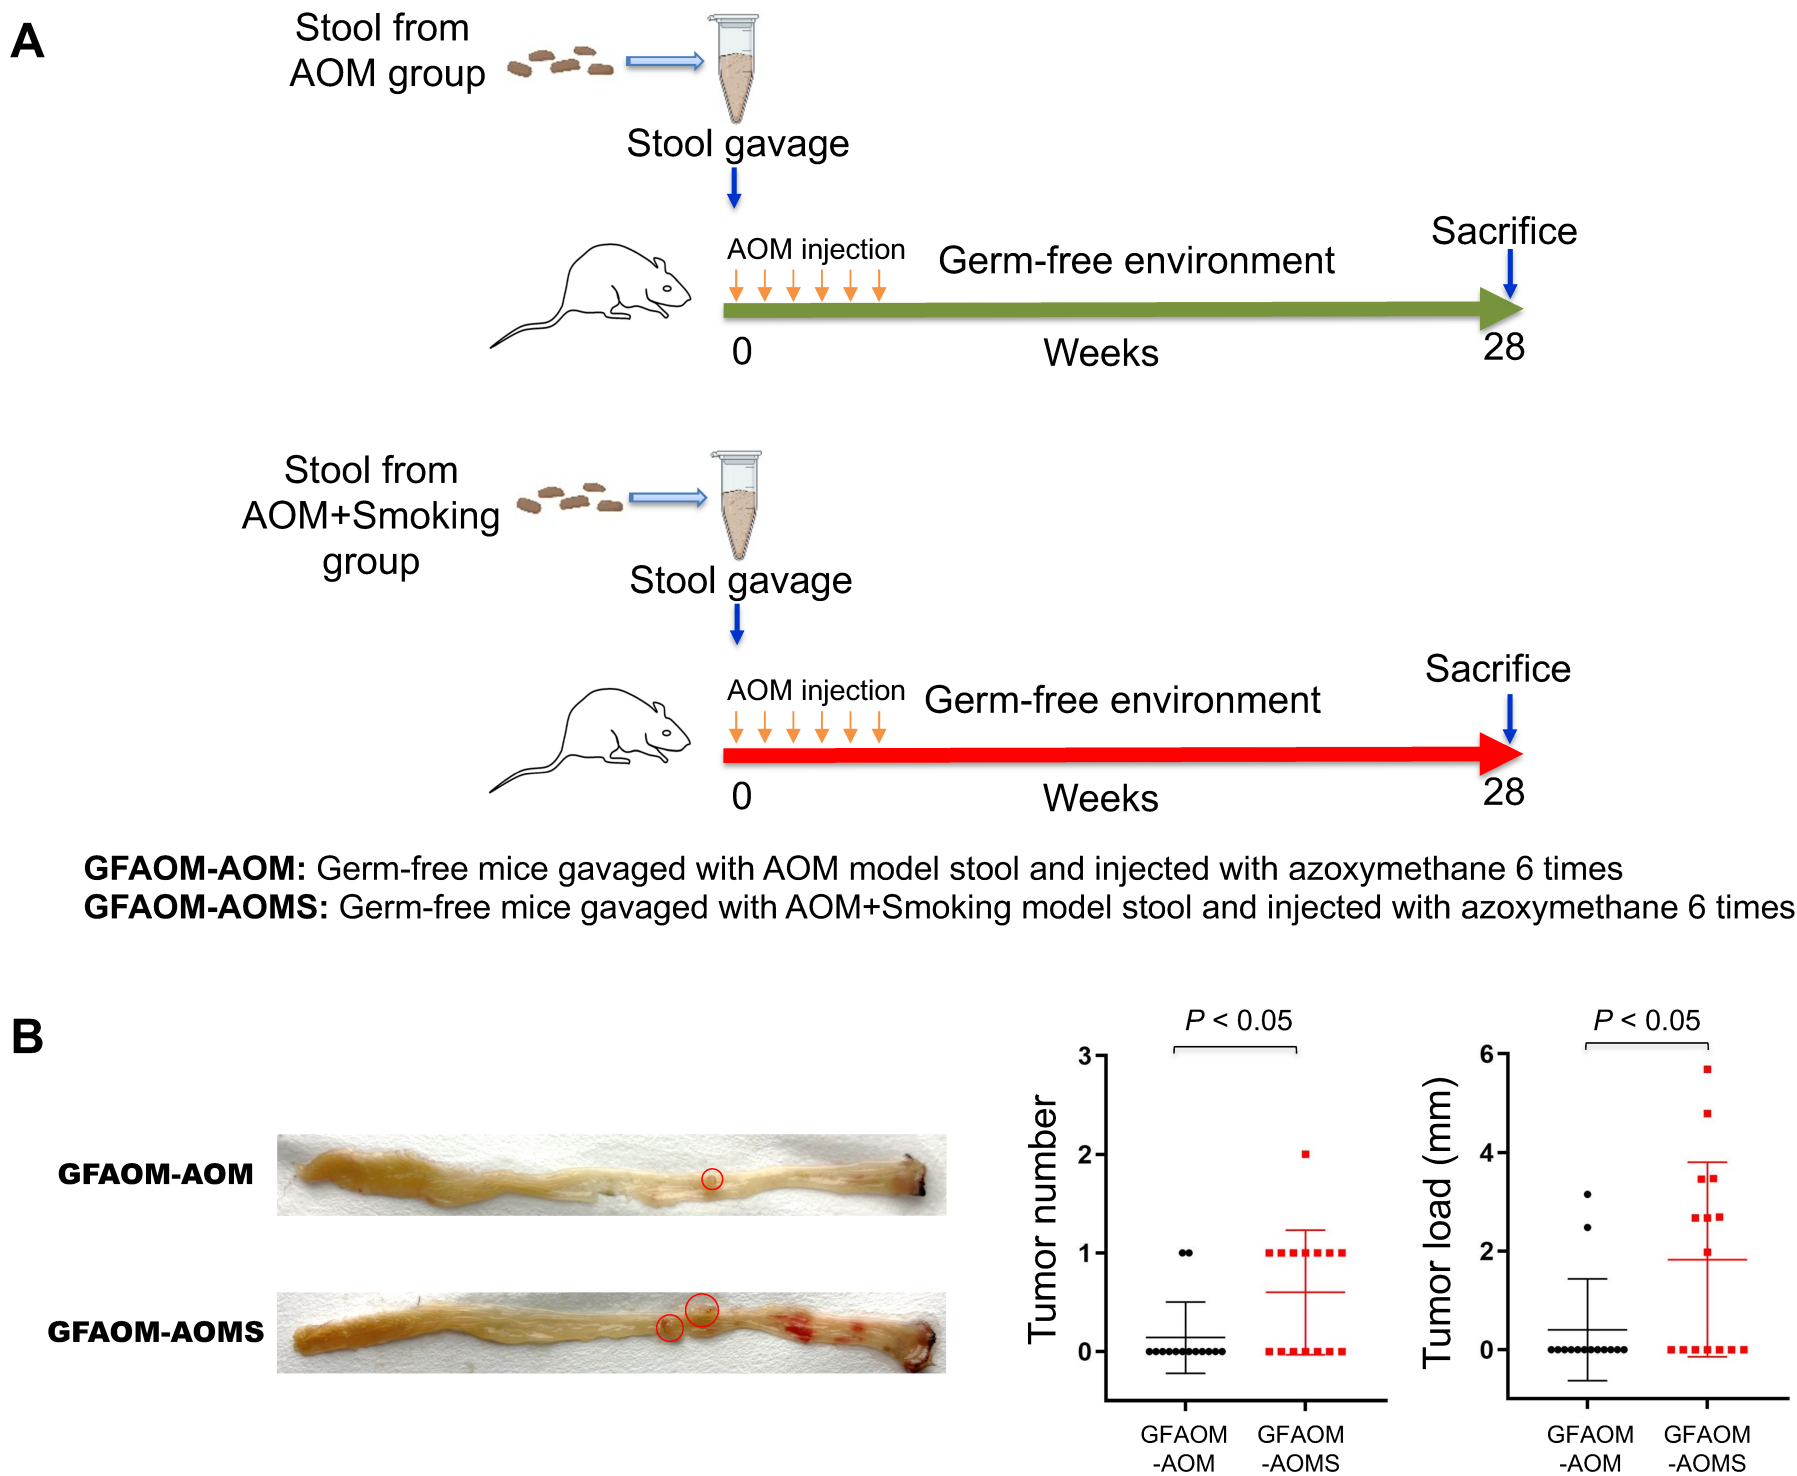

**Supplementary Figure 6. Altered microbiota by cigarette-smoke increases colonocyte tumorigenesis in germ-free AOM mice model.** (A) Schematic overview of the AOM model in the germ-free environment. Germ-free mice with 6 times AOM injection were orally gavaged with stool from AOM+Smoking and AOM groups ( $n=15/\text{group}$ ). Mice were sacrificed at the end of week 28. **GFAOM-AOM:** Germ-free mice gavaged with AOM model stool and injected with azoxymethane 6 times; **GFAOM-AOMS:** Germ-free mice gavaged with AOM+Smoking model stool and injected with azoxymethane 6 times. (B) Representative images of colon at sacrifice. Tumor number and tumor size in GFAOM-AOM and GFAOM-AOMS mice groups. Data are expressed as mean  $\pm$  SD. Statistical significance was determined by unpaired Student's t test.
